# Supplementary material for: Immunophenotypic, cytotoxic, proteomic and genomic characterization of human cord blood vs. peripheral blood CD56Dim NK cells
Source: PubMed Central journal article supplement — Innate Immun. 2019 May 8;25(5):294–304. doi: 10.1177/1753425919846584 (PMC6830905; doi:10.1177/1753425919846584), 2019-05-08

**Supplementary Table I**

| <b>Receptor</b>                    | <b>Mean %<br/>Expression CB<br/>CD56<sup>dim</sup> NK cells<br/>(n=5)</b> | <b>Mean %<br/>Expression CB<br/>CD56<sup>bright</sup> NK cells<br/>(n=5)</b> | <b>P Value</b> |
|------------------------------------|---------------------------------------------------------------------------|------------------------------------------------------------------------------|----------------|
| <b><i>KIR</i></b>                  |                                                                           |                                                                              |                |
| KIR2DL1                            | 22.03 ± 6.74                                                              | 1.41 ± 0.21                                                                  | NS             |
| KIR2DL2                            | 31.88 ± 4.39                                                              | 3.08 ± 0.99                                                                  | < 0.02         |
| KIR2DS1/KIR2DL1                    | 23.81 ± 6.8                                                               | 2.5 ± 0.39                                                                   | NS             |
| <b><i>C-Lectin</i></b>             |                                                                           |                                                                              |                |
| NKG2A                              | 81.34 ± 1.51                                                              | 87.25 ± 3.94                                                                 | NS             |
| NKG2C                              | 14.42 ± 1.21                                                              | 25.18 ± 6.11                                                                 | NS             |
| NKG2D                              | 94.08 ± 2.36                                                              | 87.22 ± 9.91                                                                 | NS             |
| <b><i>Natural cytotoxicity</i></b> |                                                                           |                                                                              |                |
| NKp44                              | 1.96 ± 0.54                                                               | 2.08 ± 1.53                                                                  | NS             |
| NKp46                              | 83.23 ± 6.05                                                              | 93.02 ± 3.33                                                                 | NS             |

Comparison of CB CD56<sup>dim</sup> versus CB CD56<sup>bright</sup> cell subsets differed in the expression of KIR2DL2.

# Supplementary Figure 1

**A**

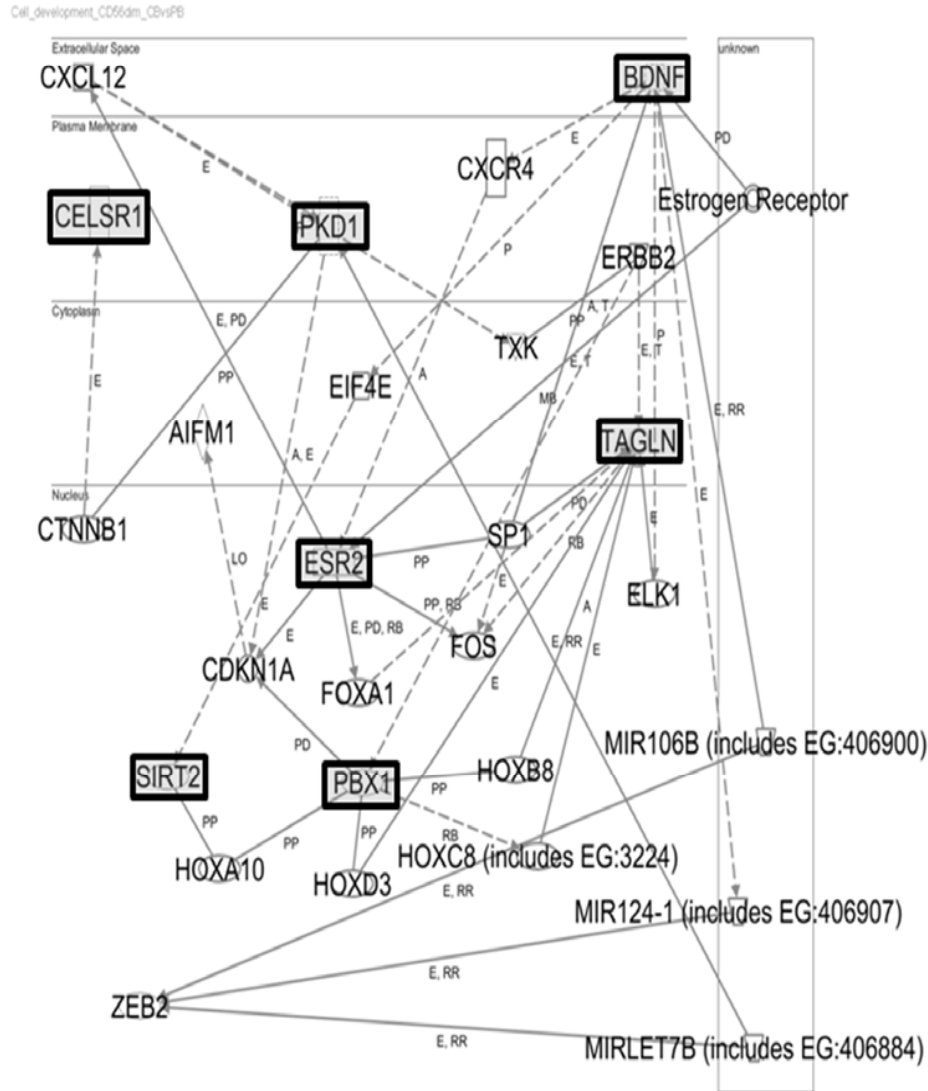

**B**

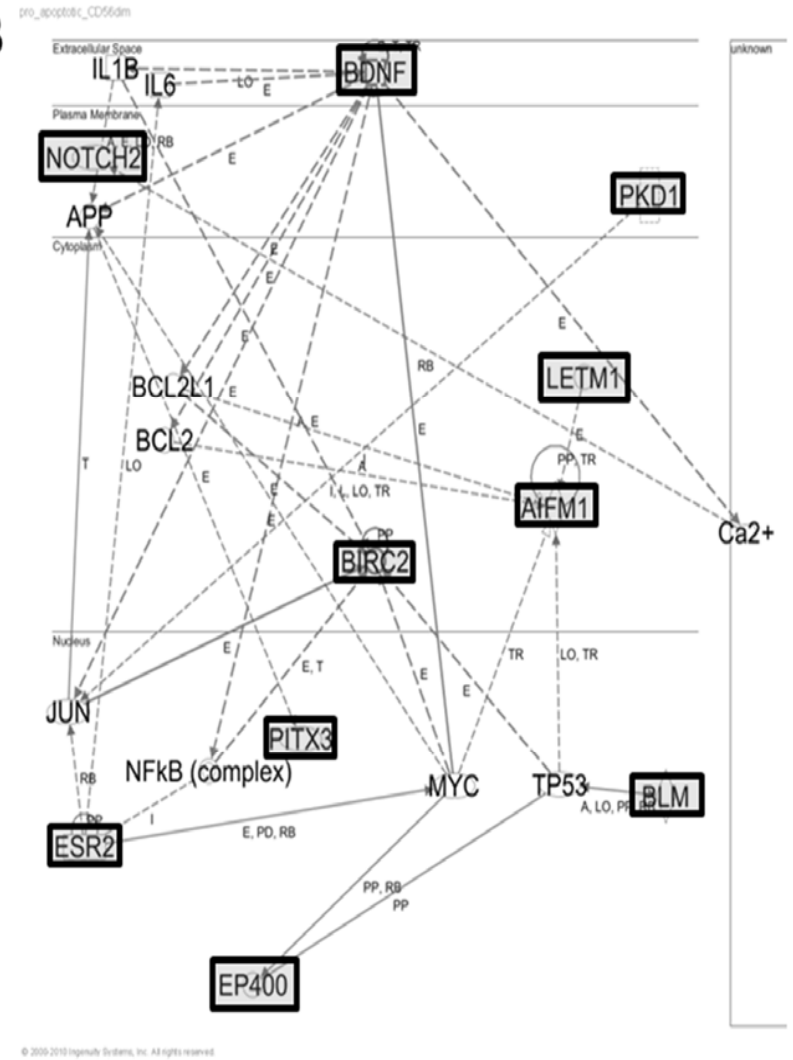

## Supplementary Figure 2

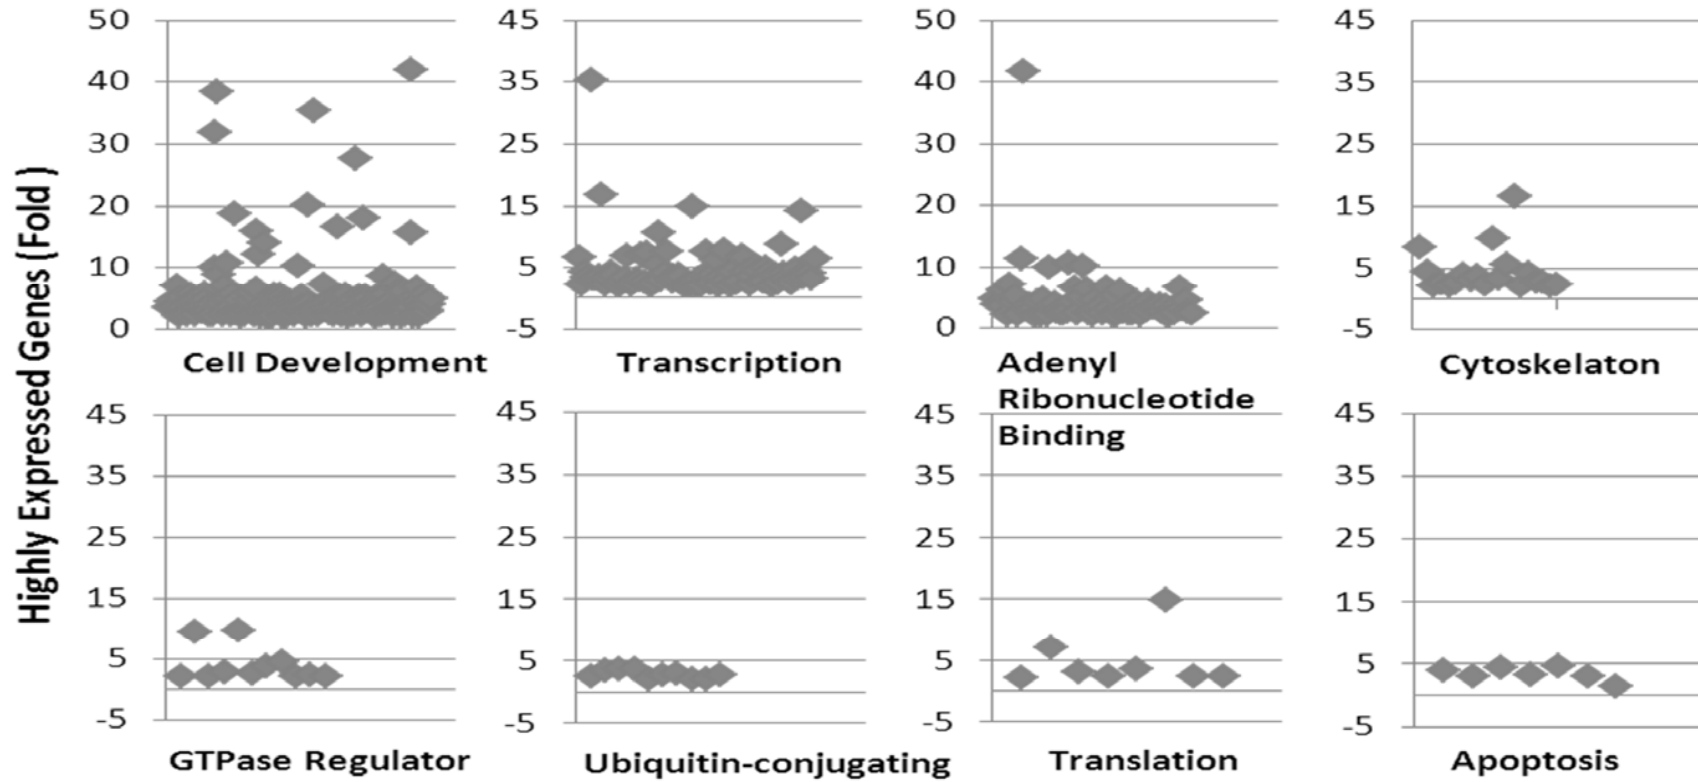

Supplement: Supplemental_Material2.pdf [file Supplemental_Material2.pdf]
