# Supplementary material for: Immunophenotypic, cytotoxic, proteomic and genomic characterization of human cord blood vs. peripheral blood CD56Dim NK cells
Source: PubMed Central journal article supplement — Innate Immun. 2019 May 8;25(5):294–304. doi: 10.1177/1753425919846584 (PMC6830905; doi:10.1177/1753425919846584), 2019-05-08
Supplement: Supplemental_Material3.pdf [file Supplemental_Material3.pdf]

## **Supplemental figure legends**

**Supplemental Figure 1.** Functional interpretation of the significantly altered expressed genes between CB vs. PB CD56<sup>dim</sup> NK cells and their relevance to molecular and cellular functions and pathways was generated by Ingenuity pathways analysis. The top molecular functions include cellular development (A) and apoptosis (B).

**Supplemental Figure 2.** After identification with Affymetrix ID, 486 genes were uploaded into the Database for Annotation Visualization and Integrated Discovery (DAVID) at the National Institute of Health and classified by functional annotation clustering. Each classified group was then re-loaded into DAVID for further sub-classification.
